# Supplementary material for: Effects of a Risk-Based Licensing Scheme on the Incidence of Alcohol-Related Assault in Queensland, Australia: A Quasi-Experimental Evaluation
Source: Int J Environ Res Public Health. 2019 Nov 21;16(23):4637. doi: 10.3390/ijerph16234637 (PMC6926782; doi:10.3390/ijerph16234637)
Supplement: Supplementary file 1 [file ijerph-16-04637-s001.pdf]

**Table S1: Risk-based licensing in Australian jurisdictions**

| Jurisdiction | Base fee | Trading hours | Compliance history | Venue capacity | Location       |
|--------------|----------|---------------|--------------------|----------------|----------------|
| ACT          | ✓        | ✓             |                    | ✓              |                |
| NSW          | ✓        | ✓             | ✓                  | ✓              | ✓ <sup>1</sup> |
| Queensland   | ✓        | ✓             | ✓                  |                |                |
| SA           | ✓        | ✓             |                    | ✓              |                |
| Victoria     | ✓        | ✓             | ✓                  | ✓ <sup>2</sup> |                |

---

<sup>1</sup> Applicable when compliance history risk loading is applied and venues are located in the Kings Cross and Sydney Central Business District.

<sup>2</sup> Applicable when compliance history risk loading is applied.

**Table S2. High alcohol hours and low alcohol hours for Queensland\*, Australia**

| <b>High alcohol hours</b>        | <b>Low alcohol hours</b>          |
|----------------------------------|-----------------------------------|
| Sunday 18:00 - Monday 06:00      | Monday 06:00 - Monday 14:00       |
| Tuesday 22:00 - Wednesday 02:00  | Tuesday 10:00 - Tuesday 14:00     |
| Wednesday 22:00 - Thursday 02:00 | Wednesday 06:00 - Wednesday 14:00 |
| Thursday 18:00 - Friday 02:00    | Thursday 06:00 - Thursday 14:00   |
| Friday 22:00 - Saturday 06:00    | Friday 06:00 - Friday 10:00       |
| Saturday 18:00 - Sunday 06:00    | -----                             |

\*Based on the National Alcohol Indicators Project [1]

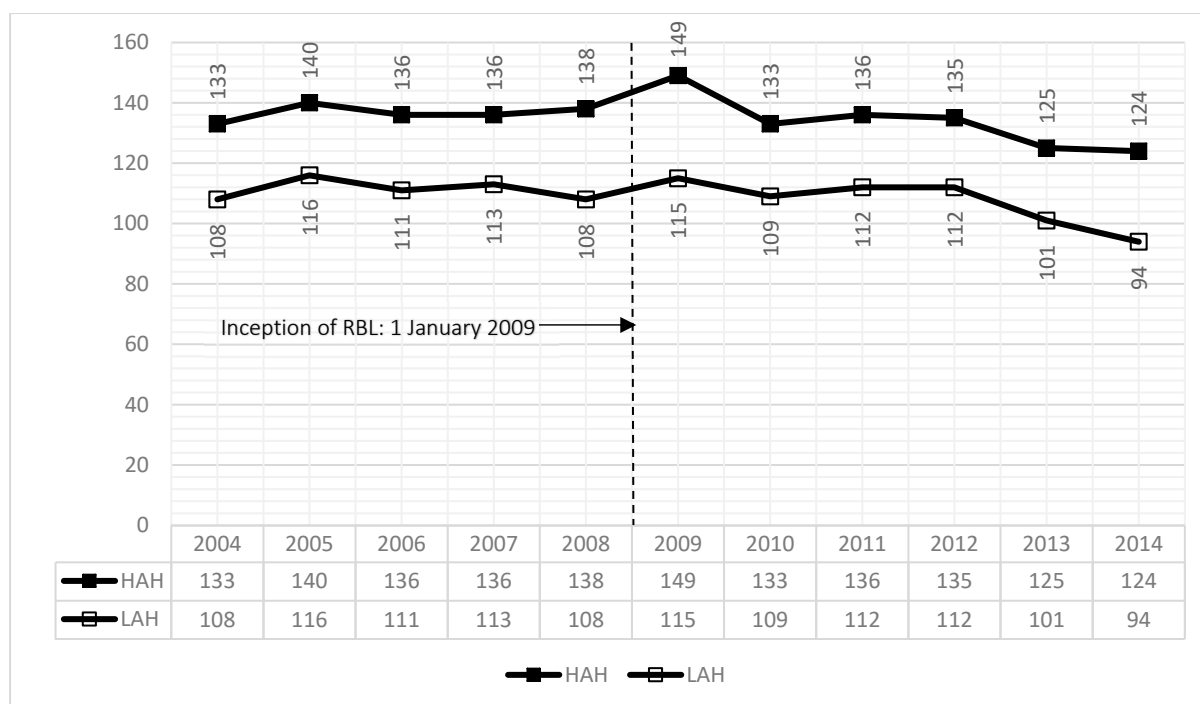

**Figure S1. Crude annual assault during ‘high alcohol hours’ (HAH) and ‘low alcohol hours’ (LAH), Queensland**

**Table S3. Comparison between assaults during high alcohol hours (HAH) and low alcohol hours (LAH) (Within-state comparison)**

| Change in assault             | $\beta$ coefficient (number of assaults per year) | 95% Confidence Interval | p-value |
|-------------------------------|---------------------------------------------------|-------------------------|---------|
| Reference: LAH                | 24.9                                              | 20.4 to 29.6            | <0.001  |
| Change in HAH and LAH pre-RBL | 0.16                                              | -1.62 to 1.93           | 0.853   |
| Step change in LAH            | 7.99                                              | -0.05 to 16.0           | 0.051   |
| Step change in HAH            | 11.4                                              | -1.27 to 24.2           | 0.074   |
| Difference in step change     | 3.45                                              | -11.2 to 18.1           | 0.624   |
| Slope change in LAH           | -3.84                                             | -6.37 to -1.31          | 0.006   |
| Slope change in HAH           | -4.40                                             | -7.48 to -1.32          | 0.008   |
| Difference in slope change    | -0.55                                             | -3.64 to 2.55           | 0.711   |

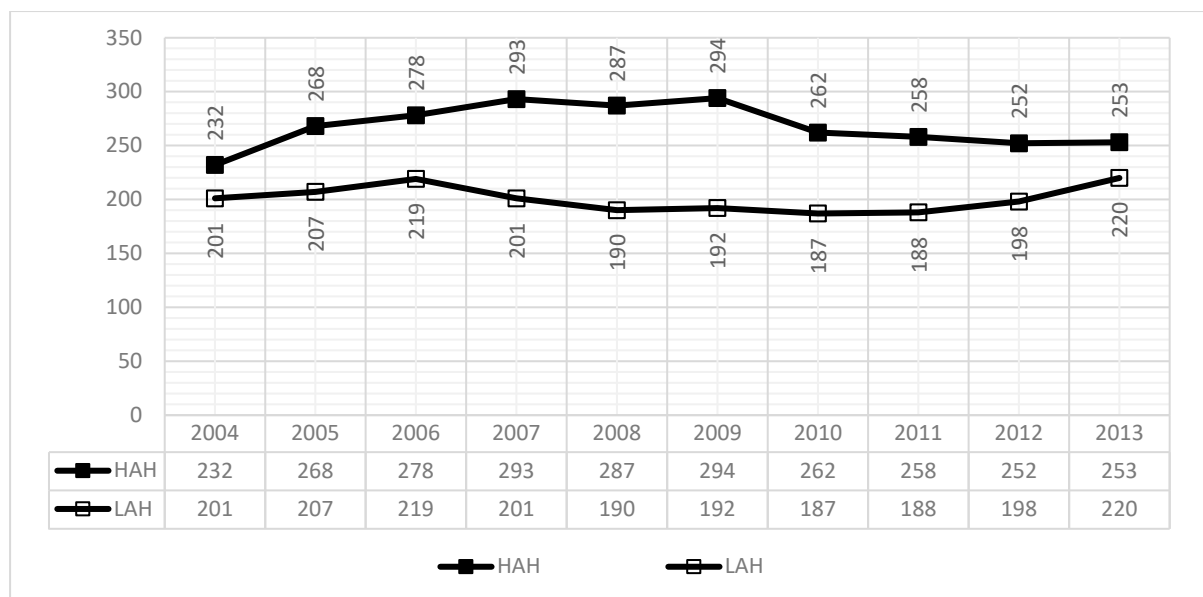

**Figure S2. Crude annual assault during ‘high alcohol hours’ (HAH) and ‘low alcohol hours’ (LAH), Western Australia**

**Table S4. Comparison between assaults during ‘high alcohol hours’ and ‘low alcohol hours’ in Queensland and Western Australia**

| <b>Change in assault</b>                                  | <b><math>\beta</math> Coefficient<br/>(number of<br/>assaults per year)</b> | <b>95% Confidence<br/>Interval</b> | <b>p-value</b> |
|-----------------------------------------------------------|-----------------------------------------------------------------------------|------------------------------------|----------------|
| Average difference Queensland vs WA pre-RBL               | -103                                                                        | -119 to -87.8                      | <0.001         |
| Average difference HAH vs LAH pre-RBL                     | 28.6                                                                        | 12.9 to 44.3                       | 0.001          |
| Change in HAH and LAH pre-RBL period, in WA               | -4.03                                                                       | -10.0 to 1.94                      | 0.177          |
| Difference, between the states, in HAH and LAH in pre-RBL | -19.3                                                                       | -25.7 to -13.0                     | <0.001         |
| Step change in LAH                                        | -20.1                                                                       | -45.4 to 5.24                      | 0.115          |
| Difference, between the states, in step change            | -6.10                                                                       | -53.0 to 40.8                      | 0.791          |
| Slope change in LAH                                       | 10.8                                                                        | 1.67 to 19.9                       | 0.022          |
| Difference, between the states, in slope change           | 33.3                                                                        | 20.4 to 46.3                       | <0.001         |

**Table S5. Difference in assaults during high alcohol hours (HAH) from pre- to post-RBL in Queensland, Australia (excluding 2008)**

| Change in assault        | $\beta$ coefficient (number of assaults per year) | 95% Confidence Interval | p-value |
|--------------------------|---------------------------------------------------|-------------------------|---------|
| Change in HAH in pre-RBL | 1.15                                              | -2.30, 4.60             | 0.445   |
| Step change in HAH       | 10.0                                              | -6.36, 26.4             | 0.185   |
| Slope change in HAH      | -5.50                                             | -0.877, -10.1           | 0.027   |

**Table S6. Difference in assaults during high alcohol hours (HAH) from pre- to post-RBL in Queensland, Australia (excluding 2009)**

| Change in assault        | $\beta$ coefficient (number of assaults per year) | 95% Confidence Interval | p-value |
|--------------------------|---------------------------------------------------|-------------------------|---------|
| Change in HAH in pre-RBL | 0.97                                              | -1.54, 3.49             | 0.379   |
| Step change in HAH       | 3.59                                              | -8.54, 15.7             | 0.479   |
| Slope change in HAH      | -3.82                                             | -0.347, -7.30           | 0.036   |

## References

1. Chikritzhs T, Stockwell T, Heale P, Dietze P, Webb M. National alcohol indicators project technical report no. 2: Trends in alcohol-related road Injury in Australia, 1990-1997. Perth: National Drug Research Institute, Turning Point, Alcohol and Drug Centre Inc.; 2000.
